# Supplementary material
Source: PubMed Central journal article supplement (PMC7777165)
Supplement: pnas.1919350117.sapp.pdf [file pnas.1919350117.sapp.pdf]

Supporting Information for

## **The $\beta$ -encapsulation cage of rearrangement hotspot (Rhs) effectors is required for type VI secretion**

Supporting Information Materials and Methods

Tables S1 to S3

References for SI citations

Figures S1 to S5

Movies S1 to S10

### **Materials and Methods**

**Bacterial Strains.** Bacterial strains are listed in **Tables S1**. All ECL strains are derivatives *E. cloacae* subsp. *cloacae* ATCC 13047. Bacteria were cultured at 37 °C in shaking lysogeny broth (LB) or on LB-agar supplemented with 150  $\mu$ g/mL ampicillin (Amp), 66  $\mu$ g/mL chloramphenicol (Cm), 50  $\mu$ g/mL kanamycin (Kan), 100  $\mu$ g/mL spectinomycin (Spc), 200  $\mu$ g/ml rifampicin (Rif) or 25  $\mu$ g/mL tetracycline (Tet) where appropriate. For competition co-cultures, inhibitor and target bacteria were grown in LB media supplemented with appropriate antibiotics to mid-log phase, then collected by centrifugation and re-suspended in 1 $\times$  M9 salts. *E. coli* X90 was used as a target strain for all inter-species competitions. Inhibitor and target cells were mixed at a 1:1 ratio (at OD<sub>600</sub> ~17), spread onto LB-agar without antibiotics and incubated at 37 °C for 4 h. Aliquots were taken at the beginning and end of co-culture to quantify viable inhibitor- and target-cell colony forming units on antibiotic-selective media. Competitive indices were calculated as the final ratio of inhibitor to target cells divided by the initial ratio.

The *tIe* (ECL\_01553), *tIi* (ECL\_01554), ECL\_03144, ECL\_03145, *eagR<sub>A</sub>* (ECL\_01566) and *eagR<sub>B</sub>* (ECL\_03141) genes were deleted as described (1, 2). Regions upstream and downstream of *tIe* were amplified with primers CH3373/CH3374 and CH3375/CH3376 (respectively) and ligated sequentially to

pKAN to generate pCH11848. The *SacI*/*KpnI* restriction fragment from pCH11848 was electroporated into ECL that express the phage  $\lambda$  Red recombinase proteins from plasmid pKOBEG (3). Kanamycin-resistant  $\Delta tle::kan$  (CH11876) transformants were selected on LB-agar supplemented with Kan. A homology region downstream of *tli* was amplified with primers CH3377/CH3378 and ligated via *XhoI*/*KpnI* to plasmid pSPM. The resulting plasmid was used as a vector to subclone the *SacI*/*BamHI* fragment from pCH11848, generating the combined *tle-tli* deletion construct pCH11939. The *SacI*/*KpnI* fragment from the latter plasmid was used to delete *tli* from strain CH11876 to generate CH11895. Regions upstream and downstream of ECL\_03144 were amplified with primer pairs CH3391/CH3392 and CH3393/CH3394 and ligated sequentially to pKAN to generate plasmid pCH11871. The *SacI*/*KpnI* fragment was recombineered into ECL to generate strain CH11716. A region downstream of ECL\_03145 was amplified with primers CH3395/CH3396 and ligated to plasmid pCH11871 using *EcoRI*/*KpnI* to generate pCH11872. The *SacI*/*KpnI* fragment from pCH11872 was recombineered into strain CH1347 to generate CH11902. Regions upstream and downstream of *eagR<sub>A</sub>* (ECL\_01566) were amplified using primers CH2901/2902 and CH3775/CH2904, and the fragments cloned sequentially into pKAN to generate plasmid pCH12318. Regions upstream and downstream of *eagR<sub>B</sub>* (ECL\_03141) were amplified using primers CH3471/CH3472 and CH3473/CH3474 (respectively), and the fragments cloned sequentially into pKAN to generate plasmid pCH11921. Linear *SacI*/*KpnI* fragments from the plasmids were recombineered into ECL to generate strains CH12688 and CH11906.

Homology fragments for the deletion of *tssM2* (ECL\_01813), *hcp1* (ECL\_01541), *tae4* (ECL\_01542) and *tai4* (ECL\_01543) were fused directly to antibiotic-resistance cassettes using overlap extension PCR (OE-PCR) (4). Regions upstream and downstream of *tssM2* were amplified with primer pairs CH2976/CH2977 and CH2978/CH2979. Regions upstream and downstream of *hcp1* were amplified with primer pairs CH2982/CH2981 and CH2980/CH2983. Regions upstream and downstream of *tae4* were amplified with primer pairs CH2964/CH2965 and CH2966/CH2967. A region downstream of *tai4* was amplified with CH2968/CH2969. Kan<sup>R</sup> and Spc<sup>R</sup> cassettes were amplified from pKAN and pSPM (respectively) using primers CH2952/CH2953. The final OE-PCR products were introduced into the ECL genome using phage  $\lambda$  Red-mediated recombination.

*rhsA* fragments containing in-frame stop codons at positions 251, 967, 1324 and 1330 were amplified with primer pairs CH3558/CH3559, CH3560/CH3561, CH3316/CH3317 and CH3699/CH3698 (respectively). Each fragment was digested with *SacI*/*Bam*HI and ligated to plasmid pCH10958 (2). *rhsB* fragments containing in-frame stop codons at positions 207, 858, 1162 and 1278 were amplified with primer pairs CH3232/CH3233, CH3318/CH3319, CH3234/CH3235 and CH3234/CH3831 (respectively). Each fragment was ligated to plasmid pKAN using either *SacI*/*Bam*HI or *SacI*/*NotI* restriction sites. The *rhsB-206* and *rhsB-857* constructs were completed by ligation of the *EcoRI*/*KpnI* fragment from plasmid pCH11044. A region downstream of *rhsB* was amplified with primers CH2907/CH2834 and ligated via *EcoRI*/*XhoI* to complete the *rhsB-1161* and *rhsB-1277* constructs. The VSV-G epitope sequence was added to *vgrG2* by sequential PCR using primer pairs CH3937/CH3945 and CH3937/CH3946. The resulting product was ligated to pCH11502 (2) using *SacI*/*NotI* restriction sites to generate plasmid pCH12883. The *Spc*<sup>R</sup> cassette from pSPM was subcloned into pCH12883 using *NotI*/*EcoRI* restriction sites to generate plasmid pCH13002. *SacI*/*KpnI* fragments from the *rhs* truncation and *vgrG2*-VSV constructs were introduced into the ECL genome using phage  $\lambda$  Red-mediated recombination.

*tssB1* (ECL\_01539) was amplified with primers ZR155/ZR306 and ligated to pKAN using *SacI*/*SpeI* restriction sites. The coding sequence for super folding GFP was amplified with ZR26/ZR27 and ligated to the construct using *SpeI*/*Bam*HI sites. Finally, a fragment of *tssC1* (ECL\_01540) was amplified with ZR22/ZR23 and ligated using *EcoRI*/*KpnI* restriction sites to generate plasmid pCH12509. The linearized construct was introduced into the ECL genome using phage  $\lambda$  Red-mediated recombination. Where appropriate for the generation of multiple chromosomal mutations, *Kan*<sup>R</sup> cassettes were removed using FLP recombinase expressed from plasmid pCP20 (5).

**Plasmid constructions.** The *tai4* immunity gene was amplified with primers CH2792/CH2793 and ligated to pZS21 using *EcoRI*/*Bam*HI restriction sites to generate plasmid pCH11686. The *tli* immunity gene was amplified with primers CH3418/CH3419 and ligated to pCH450K using *KpnI*/*XhoI* restriction sites to generate plasmid pCH494. For complementation studies, the *eagR<sub>A</sub>* and *eagR<sub>B</sub>* genes were amplified with CH4190/CH2911 and CH2886/CH2887, and ligated to pCH450K using *KpnI*/*XhoI*

restriction sites to generate plasmids pCH13568 and pCH12033, respectively. The *vgrG2-VSV* coding sequence was amplified from strain CH14452 using primers CH4452/CH4453, then ligated to pBAD24 (6) using EcoRI/XhoI restriction sites to generate plasmid pCH14397. A NsiI/XhoI fragment containing *araC* and *vgrG2-VSV* was excised from pCH14397 and ligated to pZS21(Cm) to generate plasmid pCH248. The *his<sub>6</sub>-eagR<sub>A</sub>* coding sequence was amplified with CH5386/CH2911 and ligated via EcoRI/XhoI to pSCBAD (7) to generate plasmid pCH1000. The *eagR<sub>A</sub>-rhsA-rhsI<sub>A</sub>* cluster was amplified with CH4400/CH4329 and ligated to pSCBAD and pCH450 via EcoRI/XhoI to generate plasmids pCH1587 and pCH14640, respectively. The *eagR<sub>A</sub>-rhsA-250* fragment was amplified with primers CH4400/CH5387 and ligated to pSCBAD via EcoRI/XhoI to generate plasmid pCH1583. *his<sub>6</sub>-eagR<sub>A</sub>-rhsA-rhsI<sub>A</sub>* and *his<sub>6</sub>-eagR<sub>A</sub>-rhsA-250* were amplified with CH5386/CH4329 and CH5386/CH5387 and ligated to pCH450 via EcoRI/XhoI to generate plasmids pCH5885 and pCH5881, respectively.

The transmembrane helices of RhsA were deleted in two steps. Plasmid pCH5885 was amplified with primers CH5386/CH5414, and the product ligated to pCH5885 using EcoRI and NcoI restriction sites. A downstream fragment was then amplified with CH5415/CH5416 and ligated to the intermediate construct using SpeI/NcoI to generate plasmid pCH1218. pCH1218 was amplified with CH5386/CH5387 and the product ligated via EcoRI/XhoI to the parent plasmid to generate pCH1220. pCH1218 was also amplified with primers CH4400/CH5414 and the product ligated via EcoRI/NcoI to pCH1587 to generate plasmid pCH1588. The conserved DPxGL motif of RhsA was mutated in two steps. First, a SpeI restriction site (that also introduces an Arg1321Ser substitution) was introduced upstream of the motif by amplification with primers CH4328/CH4631 and ligated to plasmid pCH14640 via KpnI/SbfI. The *rhsA-CT/rhsI* module was amplified with CH4632/CH3636 (DPxGL) and CH4898/CH3636 (APxGL), and the products ligated via SpeI/XhoI to the intermediate construct to generate plasmids pCH15046 and pCH15105. To append C-terminal FLAG epitopes onto the RhsA variants, wild-type, DPxGL and APxGL constructs were amplified with primers CH4328/CH4629 and the products ligated to pCH5885 using KpnI/SbfI to generate plasmids pCH1594 (wild-type), pCH1595 (DPxGL) and pCH1596 (APxGL).

**Polyclonal antisera.** The *hcp1* coding sequence was amplified with primers CH3020/CH3022 and ligated to pET21 using NcoI/XhoI restriction sites to generate plasmid pCH11163. The *rhsA* coding sequence for Val82 to Ala467 was amplified with primers CH2960/CH2879 and ligated to pET21 in the same manner to generate pCH11463. Both proteins were over-produced in *E. coli* strain CH2016 (8). Overnight cultures were diluted 1:100 in fresh LB media supplemented with Amp and grown to mid-log phase at 37 °C. Protein production was induced with 1.5 mM IPTG for 90 min. Cells were harvested by centrifugation and the pellets frozen at –80°C. Cells were broken by freeze-thaw in urea lysis buffer [8 M urea, 50 mM Tris-HCl (pH 7.5), 150 mM NaCl]. Hcp1-His<sub>6</sub> and RhsA(1-467)-His<sub>6</sub> were purified by Ni<sup>2+</sup>-affinity chromatography under denaturing conditions in urea lysis buffer and eluted in urea lysis buffer supplemented with 25 mM EDTA. Proteins were judged to be >95% pure by SDS-PAGE analysis. Purified proteins were dialyzed against water, then lyophilized for injection into New Zealand white rabbits to generate polyclonal antisera (Cocalico Biologicals Inc., Reamstown, PA).

**Affinity purifications.** Overnight cultures of ECL *vgrG2*-VSV strains were diluted to OD<sub>600</sub> ~0.05 in LB media supplemented with 0.4% L-arabinose and cultured with shaking at 37 °C. Once in log phase, cells were collected by centrifugation then resuspended in immunoprecipitation buffer [20 mM Tris-HCl (pH 7.5), 150 mM NaCl, 2% glycerol, 1% Triton X-100]. Cells were broken by two passages through a French press. Unbroken cells and insoluble material were removed by centrifugation at 23,000 ×g for 10 min at 4 °C. Anti-VSV-G agarose beads (Sigma-Aldrich) were added to clarified lysates, followed by incubation on a rotisserie for 1 h at 4 °C. After extensive washing with immunoprecipitation buffer, proteins were eluted by boiling in SDS sample-loading buffer.

For immunoprecipitation of over-produced RhsA•VgrG2-VSV complexes from ECL (CH13109), cells were grown to late log phase in LB media supplemented with 0.4% arabinose at 37 °C. Cells were collected by centrifugation and frozen at –80 °C. Frozen cells were resuspended in 50 mM Tris-HCl (pH 8.0), 300 mM NaCl supplemented with 100 µg/mL lysozyme and broken sonication. Clarified lysates incubated with anti-VSV-G agarose on a rotisserie for 1 h at 4 °C. Samples of the lysate and the

unbound fraction were saved for SDS-PAGE and immunoblotting. After extensive washing with immunoprecipitation buffer, proteins were eluted by boiling in SDS sample-loading buffer.

ECL strains (CH13104 through CH13109) carrying plasmid pCH1000 (His<sub>6</sub>-EagR<sub>A</sub>) were grown at 37 °C to mid-log phase and protein production was induced with 0.4% L-arabinose for 1.5 h. Cells were collected by centrifugation and re-suspended in binding buffer [50 mM Tris-HCl (pH 8.0), 300 mM NaCl, 10 mM imidazole] supplemented with 50 µg/mL lysozyme. Cells were broken by sonication and lysates clarified by centrifugation at 23,000 ×g for 10 min at 4 °C. Ni<sup>2+</sup>-nitrilotriacetic acid (NTA) agarose resin (50 to 70 µL) was added to the lysates, followed by incubation on a rotisserie for 1 h at 4 °C. Resins were washed with 7.0 mL of binding buffer, and bound protein eluted with 100 µL of binding buffer supplemented with 50 mM EDTA.

His<sub>6</sub>-EagR<sub>A</sub>•RhsA and VgrG2-VSV were co-produced in *E. coli* X90 cells from two compatible arabinose-inducible plasmid constructs. Cells were grown in LB media (3.0 mL) supplemented with 0.4% L-arabinose for 2 h, then harvested by centrifugation and frozen at –80 °C. Cells were resuspended in 1.8 mL of binding buffer supplemented with 50 µg/mL lysozyme and broken by sonication. Aliquots of the clarified lysates were saved for SDS-PAGE and immunoblot analyses. Ni<sup>2+</sup>-nitrilotriacetic acid (NTA) agarose resin (50 to 70 µL) was added to the lysates, followed by incubation on a rotisserie for 1 h at 4 °C. Supernatants from the Ni<sup>2+</sup>-NTA binding reactions were saved for SDS-PAGE and immunoblot analyses. Resins were washed with 7.0 mL of binding buffer, and bound protein eluted with 100 µL of binding buffer supplemented with 50 mM EDTA. *E. coli* cells carrying *his<sub>6</sub>-eagR<sub>A</sub>-rhsA-FLAG* constructs were grown at 37 °C to mid-log phase and protein production was induced with 0.4% L-arabinose for 1.5 h. Cells were collected by centrifugation and processed as described above to isolate protein complexes by Ni<sup>2+</sup>-NTA affinity chromatography.

**Immunoblot analysis.** Samples were analyzed by Tris-tricine SDS-PAGE on two-tier 7.5%/15% polyacrylamide gels run at 110 V (constant), or 10% polyacrylamide gels run at 110 V for 1 h. Gels were soaked for 10 min in 25 mM Tris, 192 mM glycine (pH 8.6), 10% methanol, then electroblotted to low-fluorescence PVDF membranes using a semi-dry transfer apparatus at 17 V (constant) for 1 h.

Membranes were blocked with 4% non-fat milk in 1× PBS for 30 min at room temperature, and incubated with primary antibodies in 0.1% non-fat milk in 1× PBS overnight at 4 °C. Rabbit polyclonal antisera to Hcp1-His<sub>6</sub> was used at a 1:10,000 dilution and antisera to RhsA(V82-A467)-His<sub>6</sub> was used at a 1:5,000 dilution. Mouse anti-VSV-G (Sigma-Aldrich) was used at a 1:150,000 dilution. Blots were incubated with 800CW-conjugated goat anti-rabbit IgG (1:125,000 dilution, LICOR) or 680LT-conjugated goat anti-mouse IgG (1:125,000 dilution, LICOR) in 1× PBS. Immunoblots were visualized with a LI-COR Odyssey infrared imager.

**Hcp1 secretion.** ECL cells were grown to mid-log phase in LB media at 37 °C, then collected by centrifugation at 3,000 ×g for 5 min. Cell pellets were washed once with 1× M9 salts, then resuspended in urea lysis buffer and subjected to a freeze-thaw cycle to extract proteins for SDS-PAGE and immunoblotting. Culture supernatants were centrifuged again to remove cellular contamination. Supernatants were adjusted to 75% ethanol and incubated overnight at –80 °C. Proteins were precipitated by centrifugation at 21,000 ×g for 15 min at 4 °C. Precipitates were washed once with 75% ice-cold ethanol, then air-dried and dissolved in urea lysis buffer. Samples were analyzed by SDS-PAGE using Tris-tricine 10% polyacrylamide gels, which were immunoblotted as described above.

**Fluorescence microscopy.** ECL strains expressing chromosomal *tssB-gfp* fusions were inoculated from a single colony into 0.5× LB media and cultured with shaking at 37 °C. Once in mid-log phase, cells were collected by centrifugation, then spotted onto a thin pad of 1% agarose in 1× M9 minimal media and covered with a glass coverslip. Time-lapse GFP-fluorescence microscopy was performed with images taken every 5 seconds for 2.5 min per field of view, followed by a bright-field image once the time-lapse was completed. ImageJ was used for all image analysis and manipulations.

**Table S1. Bacterial strains**

| Strain  | Description <sup>a</sup>                                                                                                               | Reference  |
|---------|----------------------------------------------------------------------------------------------------------------------------------------|------------|
| X90     | <i>E. coli</i> F' <i>lacI<sup>q</sup> lac' pro' ara</i> $\Delta$ ( <i>lac-pro</i> ) <i>nal1 argE(amb) rif thi-1</i> , Rif <sup>R</sup> | (9)        |
| ECL     | <i>Enterobacter cloacae</i> subsp. <i>cloacae</i> ATCC 13047, Amp <sup>R</sup>                                                         | ATCC       |
| CH1347  | ECL $\Delta$ 03144, Amp <sup>R</sup>                                                                                                   | This study |
| CH2016  | X90 (DE3) $\Delta$ <i>rna</i> $\Delta$ <i>slyD::kan</i> , Rif <sup>R</sup> Kan <sup>R</sup>                                            | (8)        |
| CH8163  | ECL, Amp <sup>R</sup> Rif <sup>R</sup>                                                                                                 | (2)        |
| CH11178 | ECL $\Delta$ <i>rhsA::kan</i> , Amp <sup>R</sup> Kan <sup>R</sup>                                                                      | (2)        |
| CH11179 | ECL $\Delta$ <i>rhsA</i> , Amp <sup>R</sup>                                                                                            | (2)        |
| CH11181 | ECL $\Delta$ <i>rhsA</i> $\Delta$ <i>rhlA::kan</i> , Amp <sup>R</sup> Kan <sup>R</sup>                                                 | (2)        |
| CH11185 | ECL $\Delta$ <i>rhsA</i> $\Delta$ <i>rhlA</i> , Amp <sup>R</sup> Rif <sup>R</sup>                                                      | (2)        |
| CH11186 | ECL $\Delta$ <i>rhsB::kan</i> , Amp <sup>R</sup> Kan <sup>R</sup>                                                                      | (2)        |
| CH11188 | ECL $\Delta$ <i>rhsB</i> $\Delta$ <i>rhlB::spc</i> , Amp <sup>R</sup> Spc <sup>R</sup>                                                 | (2)        |
| CH11196 | ECL $\Delta$ <i>tssM1::kan</i> , Amp <sup>R</sup> Kan <sup>R</sup>                                                                     | (2)        |
| CH11199 | ECL $\Delta$ <i>hcp1::spc</i> , Amp <sup>R</sup> Spc <sup>R</sup>                                                                      | This study |
| CH11202 | ECL $\Delta$ <i>tae4::spc</i> , Amp <sup>R</sup> Spc <sup>R</sup>                                                                      | This study |
| CH11204 | ECL $\Delta$ <i>tae4</i> $\Delta$ <i>tai4::kan</i> , Amp <sup>R</sup> Kan <sup>R</sup>                                                 | This study |
| CH11205 | ECL $\Delta$ <i>tae4</i> $\Delta$ <i>tai4</i> , Amp <sup>R</sup>                                                                       | This study |
| CH11223 | ECL $\Delta$ <i>rhsB</i> $\Delta$ <i>rhlB::spc</i> , Amp <sup>R</sup> Spc <sup>R</sup> Rif <sup>R</sup>                                | (2)        |
| CH11396 | ECL $\Delta$ <i>tssM1</i> , Amp <sup>R</sup>                                                                                           | This study |
| CH11436 | ECL $\Delta$ <i>vgrG2::kan</i> , Amp <sup>R</sup> Kan <sup>R</sup>                                                                     | (2)        |
| CH11530 | ECL $\Delta$ <i>rhsA</i> <i>rhsB(L207amb)::kan</i> , Amp <sup>R</sup> Kan <sup>R</sup>                                                 | This study |
| CH11531 | ECL $\Delta$ <i>rhsA</i> <i>rhsB(E1162amb)::kan</i> , Amp <sup>R</sup> Kan <sup>R</sup>                                                | This study |
| CH11642 | ECL $\Delta$ <i>rhsA</i> <i>rhsB(D858amb)::kan</i> , Amp <sup>R</sup> Kan <sup>R</sup>                                                 | This study |
| CH11716 | ECL $\Delta$ 03144:: <i>kan</i> , Amp <sup>R</sup> Kan <sup>R</sup>                                                                    | This study |
| CH11733 | ECL $\Delta$ <i>rhsB</i> , Amp <sup>R</sup>                                                                                            | This study |
| CH11748 | ECL $\Delta$ <i>rhsB</i> $\Delta$ <i>rhsA::kan</i> , Amp <sup>R</sup> Kan <sup>R</sup>                                                 | This study |
| CH11749 | ECL $\Delta$ <i>rhsB</i> <i>rhsA(1323)::kan</i> , Amp <sup>R</sup> Kan <sup>R</sup>                                                    | This study |
| CH11876 | ECL $\Delta$ <i>tle::kan</i> , Amp <sup>R</sup> Kan <sup>R</sup>                                                                       | This study |
| CH11895 | ECL $\Delta$ <i>tle</i> $\Delta$ <i>tli::spc</i> , Amp <sup>R</sup> Spc <sup>R</sup>                                                   | This study |
| CH11902 | ECL $\Delta$ 03144 $\Delta$ 03145:: <i>kan</i> , Amp <sup>R</sup> Kan <sup>R</sup>                                                     | This study |
| CH11903 | ECL $\Delta$ <i>rhsB</i> $\Delta$ <i>rhsA</i> , Amp <sup>R</sup>                                                                       | This study |



|         |                                                                                                            |            |
|---------|------------------------------------------------------------------------------------------------------------|------------|
| CH11906 | ECL $\Delta eagR_B::kan$ , Amp <sup>R</sup> Kan <sup>R</sup>                                               | This study |
| CH12037 | ECL $\Delta tssM2::kan$ , Amp <sup>R</sup> Kan <sup>R</sup>                                                | This study |
| CH12038 | ECL $\Delta tssM1 \Delta tssM2::kan$ , Amp <sup>R</sup> Kan <sup>R</sup>                                   | This study |
| CH12226 | ECL $\Delta rhsB rhsA(966)::kan$ , Amp <sup>R</sup> Kan <sup>R</sup>                                       | This study |
| CH12384 | ECL $\Delta vgrG1::kan$ , Amp <sup>R</sup> Kan <sup>R</sup>                                                | (2)        |
| CH12385 | ECL $\Delta rhsB \Delta vgrG1::kan$ , Amp <sup>R</sup> Kan <sup>R</sup>                                    | This study |
| CH12386 | ECL $\Delta rhsB \Delta vgrG2::kan$ , Amp <sup>R</sup> Kan <sup>R</sup>                                    | This study |
| CH12391 | ECL $\Delta vgrG1$ , Amp <sup>R</sup>                                                                      | (2)        |
| CH12414 | ECL $\Delta vgrG1 \Delta vgrG2::kan$ , Amp <sup>R</sup> Kan <sup>R</sup>                                   | (2)        |
| CH12415 | ECL $\Delta rhsA \Delta vgrG1::kan$ , Amp <sup>R</sup> Kan <sup>R</sup>                                    | This study |
| CH12416 | ECL $\Delta rhsA \Delta vgrG2::kan$ , Amp <sup>R</sup> Kan <sup>R</sup>                                    | This study |
| CH12482 | ECL $tssB1-sfGFP::kan$ , Amp <sup>R</sup> Kan <sup>R</sup>                                                 | This study |
| CH12483 | ECL $tssB1-sfGFP$ , Amp <sup>R</sup>                                                                       | This study |
| CH12485 | ECL $tssB1-sfGFP \Delta rhsA::kan$ , Amp <sup>R</sup> Kan <sup>R</sup>                                     | This study |
| CH12486 | ECL $\Delta rhsA rhsB(Q1278och)::kan$ , Amp <sup>R</sup> Kan <sup>R</sup>                                  | This study |
| CH12492 | ECL $\Delta rhsB rhsA(1329)::kan$ , Amp <sup>R</sup> Kan <sup>R</sup>                                      | This study |
| CH12497 | ECL $\Delta rhsB rhsA(250)::kan$ , Amp <sup>R</sup> Kan <sup>R</sup>                                       | This study |
| CH12555 | ECL $tssB1-sfGFP \Delta rhsA$ , Amp <sup>R</sup>                                                           | This study |
| CH12561 | ECL $tssB1-sfGFP \Delta tssM1::kan$ , Amp <sup>R</sup> Kan <sup>R</sup>                                    | This study |
| CH12562 | ECL $tssB1-sfGFP \Delta vgrG1::spc$ , Amp <sup>R</sup> Spc <sup>R</sup>                                    | This study |
| CH12564 | ECL $tssB1-sfGFP \Delta vgrG1::spc \Delta vgrG2::kan$ , Amp <sup>R</sup> Spc <sup>R</sup> Kan <sup>R</sup> | This study |
| CH12582 | ECL $\Delta vgrG2$ , Amp <sup>R</sup>                                                                      | This study |
| CH12594 | ECL $tssB1-sfGFP \Delta rhsA \Delta rhsB::kan$ , Amp <sup>R</sup> Kan <sup>R</sup>                         | This study |
| CH12609 | ECL $tssB1-sfGFP \Delta rhsB$ , Amp <sup>R</sup>                                                           | This study |
| CH12612 | ECL $tssB1-sfGFP \Delta rhsB rhsA(250)::kan$ , Amp <sup>R</sup> Kan <sup>R</sup>                           | This study |
| CH12613 | ECL $tssB1-sfGFP \Delta rhsB rhsA(966)::kan$ , Amp <sup>R</sup> Kan <sup>R</sup>                           | This study |
| CH12614 | ECL $tssB1-sfGFP \Delta rhsB rhsA(1323)::kan$ , Amp <sup>R</sup> Kan <sup>R</sup>                          | This study |
| CH12615 | ECL $tssB1-sfGFP \Delta rhsB rhsA(1329)::kan$ , Amp <sup>R</sup> Kan <sup>R</sup>                          | This study |
| CH12688 | ECL $\Delta eagR_A::kan$ , Amp <sup>R</sup> Kan <sup>R</sup>                                               | This study |
| CH13104 | ECL $\Delta rhsB::kan vgrG2-VSV::spc$ , Amp <sup>R</sup> Kan <sup>R</sup> Spc <sup>R</sup>                 | This study |
| CH13105 | ECL $\Delta rhsB rhsA(250)::kan vgrG2-VSV::spc$ , Amp <sup>R</sup> Kan <sup>R</sup> Spc <sup>R</sup>       | This study |

|         |                                                                                                        |            |
|---------|--------------------------------------------------------------------------------------------------------|------------|
| CH13106 | ECL $\Delta rhsB rhsA(966)::kan vgrG2-VSV::spc$ , Amp <sup>R</sup> Kan <sup>R</sup> Spc <sup>R</sup>   | This study |
| CH13107 | ECL $\Delta rhsB rhsA(1323)::kan vgrG2-VSV::spc$ , Amp <sup>R</sup> Kan <sup>R</sup> Spc <sup>R</sup>  | This study |
| CH13108 | ECL $\Delta rhsB rhsA(1329)::kan vgrG2-VSV::spc$ , Amp <sup>R</sup> Kan <sup>R</sup> Spc <sup>R</sup>  | This study |
| CH13109 | ECL $\Delta rhsB \Delta rhsA::kan vgrG2-VSV::spc$ , Amp <sup>R</sup> Kan <sup>R</sup> Spc <sup>R</sup> | This study |
| CH13230 | ECL $\Delta tssM1::kan vgrG2-VSV::spc$ , Amp <sup>R</sup> Kan <sup>R</sup> Spc <sup>R</sup>            | This study |
| CH13286 | ECL $\Delta rhsA::kan vgrG2-VSV::spc$ , Amp <sup>R</sup> Kan <sup>R</sup> Spc <sup>R</sup>             | This study |
| CH15044 | ECL $\Delta rhsA \Delta tae4::spc$ , Amp <sup>R</sup> Spc <sup>R</sup>                                 | This study |
| CH15045 | ECL $\Delta rhsB \Delta tae4::spc$ , Amp <sup>R</sup> Spc <sup>R</sup>                                 | This study |

<sup>a</sup>Abbreviations: Amp<sup>R</sup>, ampicillin-resistant; Kan<sup>R</sup>, kanamycin-resistant; Rif<sup>R</sup>, rifampicin-resistant; Spc<sup>R</sup>, Spectinomycin-resistant

**Table S2. Plasmids**

| Plasmid number | Description <sup>a</sup>                                                                                            | Reference  |
|----------------|---------------------------------------------------------------------------------------------------------------------|------------|
| pBAD24         | Carries <i>araC</i> and P <sub>BAD</sub> promoter, Amp <sup>R</sup>                                                 | (6)        |
| pCP20          | temperature sensitive replication origin, expresses FLP recombinase. Amp <sup>R</sup> , Cm <sup>R</sup>             | (5)        |
| pKOBEG         | temperature sensitive replication origin, expresses the Bet-Gam-Exo proteins from phage $\lambda$ . Cm <sup>R</sup> | (3)        |
| pSCBAD         | Carries <i>araC</i> and P <sub>BAD</sub> promoter, Tp <sup>R</sup>                                                  | (7)        |
| pCH70          | pKAN, Kan <sup>R</sup> , Amp <sup>R</sup>                                                                           | (10)       |
| pCH248         | pZSBAD:: <i>vgrG2-VSV</i> , Cm <sup>R</sup>                                                                         | This study |
| pCH450         | pACYC184 derivative that carries <i>araC</i> and P <sub>BAD</sub> promoter, Tet <sup>R</sup>                        | (8)        |
| pCH450K        | derivative of pCH450 with 5'-Kpn cloning site, Tet <sup>R</sup>                                                     | (2)        |
| pCH494         | pCH450K:: <i>tli</i> , Tet <sup>R</sup>                                                                             | This study |
| pCH1000        | pSCBAD:: <i>his<sub>6</sub>-eagR<sub>A</sub></i> , Tp <sup>R</sup>                                                  | This study |
| pCH1218        | pCH450:: <i>his<sub>6</sub>-eagR<sub>A</sub>-rhsA(<math>\Delta</math>TM)-rhsl</i> , Tet <sup>R</sup>                | This study |
| pCH1220        | pCH450:: <i>his<sub>6</sub>-eagR<sub>A</sub>-rhsA(<math>\Delta</math>TM)-250</i> , Tet <sup>R</sup>                 | This study |
| pCH1583        | pSCBAD:: <i>eagR<sub>A</sub>-rhsA-250</i> , Tp <sup>R</sup>                                                         | This study |
| pCH1587        | pSCBAD:: <i>eagR<sub>A</sub>-rhsA-rhsl<sub>A</sub></i> , Tp <sup>R</sup>                                            | This study |
| pCH1588        | pSCBAD:: <i>eagR<sub>A</sub>-rhsA(<math>\Delta</math>TM)-rhsl<sub>A</sub></i> , Tp <sup>R</sup>                     | This study |
| pCH1594        | pCH450:: <i>his<sub>6</sub>-eagR<sub>A</sub>-rhsA-FLAG</i> , Tet <sup>R</sup>                                       | This study |
| pCH1595        | pCH450:: <i>his<sub>6</sub>-eagR<sub>A</sub>-rhsA(R1321S)-FLAG</i> , Tet <sup>R</sup>                               | This study |
| pCH1596        | pCH450:: <i>his<sub>6</sub>-eagR<sub>A</sub>-rhsA(R1321S/D1323A)-FLAG</i> , Tet <sup>R</sup>                        | This study |

|          |                                                                                                                        |            |
|----------|------------------------------------------------------------------------------------------------------------------------|------------|
| pCH5881  | pCH450:: <i>his</i> <sub>6</sub> - <i>eagR</i> <sub>A</sub> - <i>rhsA</i> -250, Tet <sup>R</sup>                       | This study |
| pCH5885  | pCH450:: <i>his</i> <sub>6</sub> - <i>eagR</i> <sub>A</sub> - <i>rhsA</i> - <i>rhl</i> <sub>A</sub> , Tet <sup>R</sup> | This study |
| pCH9384  | pSPM, Spc <sup>R</sup> , Amp <sup>R</sup>                                                                              | (11)       |
| pCH10958 | pKAN:: <i>Δr</i> <i>hsA</i> , Kan <sup>R</sup> , Amp <sup>R</sup>                                                      | (2)        |
| pCH11044 | pKAN:: <i>Δr</i> <i>hsB</i> , Kan <sup>R</sup> , Amp <sup>R</sup>                                                      | (2)        |
| pCH11050 | pKAN:: <i>ΔtssM1</i> , Kan <sup>R</sup> , Amp <sup>R</sup>                                                             | (2)        |
| pCH11163 | pET21P:: <i>hcp1</i> , Amp <sup>R</sup>                                                                                | This study |
| pCH11430 | pTrc99-Cm, Cm <sup>R</sup>                                                                                             | (2)        |
| pCH11459 | pSPM:: <i>ΔvgrG1</i> , Spc <sup>R</sup> , Amp <sup>R</sup>                                                             | (2)        |
| pCH11463 | pET21P:: <i>r</i> <i>hsA</i> (82-467), Amp <sup>R</sup>                                                                | This study |
| pCH11502 | pKAN:: <i>ΔvgrG2</i> , Kan <sup>R</sup> , Amp <sup>R</sup>                                                             | (2)        |
| pCH11632 | pKAN:: <i>r</i> <i>hsB</i> (L207 <i>amb</i> ), Kan <sup>R</sup> , Amp <sup>R</sup>                                     | This study |
| pCH11633 | pKAN:: <i>r</i> <i>hsB</i> (E1162 <i>amb</i> ), Kan <sup>R</sup> , Amp <sup>R</sup>                                    | This study |
| pCH11635 | pKAN:: <i>r</i> <i>hsB</i> (D858 <i>amb</i> ), Kan <sup>R</sup> , Amp <sup>R</sup>                                     | This study |
| pCH11636 | pKAN:: <i>r</i> <i>hsA</i> (D1324 <i>amb</i> ), Kan <sup>R</sup> , Amp <sup>R</sup>                                    | This study |
| pCH11686 | pZS21:: <i>tai4</i> , Kan <sup>R</sup>                                                                                 | This study |
| pCH11138 | pTrc99-Cm:: <i>r</i> <i>hsl</i> <sub>B</sub> , Cm <sup>R</sup>                                                         | (2)        |
| pCH11848 | pKAN:: <i>Δt</i> <i>le</i> , Amp <sup>R</sup> Kan <sup>R</sup>                                                         | This study |
| pCH11871 | pKAN:: <i>Δ03144</i> , Amp <sup>R</sup> Kan <sup>R</sup>                                                               | This study |
| pCH11872 | pKAN:: <i>Δ03145</i> , Amp <sup>R</sup> Kan <sup>R</sup>                                                               | This study |
| pCH11921 | pKAN:: <i>ΔeagR</i> <sub>B</sub> , Kan <sup>R</sup> , Amp <sup>R</sup>                                                 | This study |
| pCH11981 | pKAN:: <i>r</i> <i>hsA</i> (M251 <i>och</i> ), Kan <sup>R</sup> , Amp <sup>R</sup>                                     | This study |
| pCH11939 | pSPM:: <i>Δt</i> <i>le-t</i> <i>li</i> , Amp <sup>R</sup> Spc <sup>R</sup>                                             | This study |
| pCH12003 | pKAN:: <i>r</i> <i>hsA</i> (H967 <i>och</i> ), Kan <sup>R</sup> , Amp <sup>R</sup>                                     | This study |
| pCH12033 | pCH450K:: <i>eagR</i> <sub>B</sub> , Tet <sup>R</sup>                                                                  | This study |
| pCH12291 | pKAN:: <i>r</i> <i>hsA</i> (Q1330 <i>och</i> ), Kan <sup>R</sup> , Amp <sup>R</sup>                                    | This study |
| pCH12318 | pKAN:: <i>ΔeagR</i> <sub>A</sub> , Kan <sup>R</sup> , Amp <sup>R</sup>                                                 | This study |
| pCH12370 | pKAN:: <i>ΔvgrG1</i> , Kan <sup>R</sup> , Amp <sup>R</sup>                                                             | (2)        |
| pCH12437 | pKAN:: <i>r</i> <i>hsB</i> (Q1278 <i>och</i> ), Kan <sup>R</sup> , Amp <sup>R</sup>                                    | This study |
| pCH12509 | pKAN:: <i>tssB1-sfGFP</i> , Kan <sup>R</sup> , Amp <sup>R</sup>                                                        | This study |
| pCH12799 | pZS21:: <i>r</i> <i>hsl</i> <sub>A</sub> , Kan <sup>R</sup>                                                            | (2)        |

|          |                                                                                          |            |
|----------|------------------------------------------------------------------------------------------|------------|
| pCH12883 | pKAN:: <i>vgrG2-VSV</i> , Kan <sup>R</sup> , Amp <sup>R</sup>                            | This study |
| pCH13002 | pSPM:: <i>vgrG2-VSV</i> , Spc <sup>R</sup> , Amp <sup>R</sup>                            | This study |
| pCH13568 | pCH450K:: <i>eagR<sub>A</sub></i> , Tet <sup>R</sup>                                     | This study |
| pCH14397 | pBAD24:: <i>vgrG2-VSV</i> , Amp <sup>R</sup>                                             | This study |
| pCH14640 | pCH450:: <i>eagR<sub>A</sub>-rhsA-rhsl<sub>A</sub></i> , Tet <sup>R</sup>                | This study |
| pCH15046 | pCH450:: <i>eagR<sub>A</sub>-rhsA(R1321S)-rhsl<sub>A</sub></i> , Tet <sup>R</sup>        | This study |
| pCH15105 | pCH450:: <i>eagR<sub>A</sub>-rhsA(R1321S/D1323A)-rhsl<sub>A</sub></i> , Tet <sup>R</sup> | This study |

<sup>a</sup>Abbreviations: Amp<sup>R</sup>, ampicillin-resistant; Cm<sup>R</sup>, chloramphenicol-resistant; Kan<sup>R</sup>, kanamycin-resistant; Tet<sup>R</sup>, tetracycline-resistant; Tp<sup>R</sup>, trimethoprim-resistant; Spc<sup>R</sup>, spectinomycin-resistant

**Table S3. Oligonucleotides**

| Identifier | Description <sup>a</sup>   | Sequence <sup>b</sup>                                    | Reference  |
|------------|----------------------------|----------------------------------------------------------|------------|
| CH2792     | tai4-Eco-for               | 5' - TTT <u>GAA TTC</u> TTC TGG AGC CTG AAA TGA AAA AG   | This study |
| CH2793     | tai4-Bam-rev               | 5' - TTT <u>GGA TCC</u> CTA CTT TGA GGA TTT GAG TGG      | This study |
| CH2834     | rhsl <sub>B</sub> -Xho-rev | 5' - TTT <u>CTC GAG</u> GTA TCC TAG CCA TAA AAA TAA TC   | (2)        |
| CH2879     | rhsA-A467-Spe-rev          | 5' - AAA <u>ACT AGT</u> GGC AGC GGT TAC GCG CTG TGG      | This study |
| CH2886     | eagR <sub>B</sub> -Kpn-for | 5' - AAT <u>GGT ACC</u> ATG ATC GCT TTT CCT GAG GG       | This study |
| CH2887     | eagR <sub>B</sub> -Xho-rev | 5' - ATC <u>CCT CGA</u> GTT AAT GGT GGA AGC G            | This study |
| CH2901     | eagR <sub>A</sub> -KO-Sac  | 5'- TTT <u>GAG CTC</u> ATG CTC CGC TGC GTT ATA           | This study |
| CH2902     | eagR <sub>A</sub> -KO-Spe  | 5' - TTT <u>ACT AGT</u> CGT GTT ATC CTG CCA GGC          | This study |
| CH2904     | eagR <sub>A</sub> -KO-Kpn  | 5' - TTT <u>GGT ACC</u> CAG AGA GCA ACA TGC CGG          | This study |
| CH2907     | rhsB-KO-Eco                | 5' - TTT <u>GAA TTC</u> CAA TGA ATA TGC TGA ATG TGA G    | (2)        |
| CH2911     | eagR <sub>A</sub> -Xho-rev | 5' - TCA <u>CTC GAG</u> CCT TAC ACA TTC CGG              | This study |
| CH2952     | pKAN-OE-for                | 5' - CCG CTC TAG AAC TAG TGG                             | This study |
| CH2953     | pKAN-OE-rev                | 5' - GTC GAC GGT ATC GAT AAG C                           | This study |
| CH2960     | rhsA-V82-Nco-for           | 5' - TGG <u>CCA TGG</u> TTA CTG ACG ATA TCA G            | This study |
| CH2964     | tae4(KO)-Sac               | 5' - GGG <u>GAG CTC</u> CCC AGC CAG GTA ATA TG           | This study |
| CH2965     | tae4(KO)-OE-rev            | 5' - CCA CTA GTT CTA GAG CGG CTT GTT TCT CCT TGA AAA G   | This study |
| CH2966     | tae4(KO)-OE-for            | 5' - GCT TAT CGA TAC CGT CGA CAC CTT CTG GAG CCT GAA ATG | This study |

|        |                       |                                                         |            |
|--------|-----------------------|---------------------------------------------------------|------------|
| CH2967 | tae4(KO)-Kpn          | 5' - TCT GAT AAT GAC CAG GCT <u>CGG TAC C</u>           | This study |
| CH2968 | tai4(KO)-OE-for       | 5' - GCT TAT CGA TAC CGT CGA CTA GTA AAG ATG AAA TCG GC | This study |
| CH2969 | tai4(KO)-Kpn          | 5' - ATA <u>GGT ACC</u> GTC ACT TCG ATG CGG             | This study |
| CH2976 | tssM2-KO-Sac          | 5' - TTT <u>GAG CTC</u> GGC AAC CGC CTG ACA C           | This study |
| CH2977 | tssM2(KO)-OE-rev      | 5' - CCA CTA GTT CTA GAG CGG CTT CCG TAG TCT TCG GTG C  | This study |
| CH2978 | tssM2 (KO)-OE-for     | 5' - GCT TAT CGA TAC CGT CGA CGG ACA GTA CGG AAA GCA G  | This study |
| CH2979 | tssM2(KO)-Kpn         | 5' - TTT <u>GGT ACC</u> GCC GAG CCA TTC                 | This study |
| CH2980 | hcp1(KO)-OE-for       | 5' - GCT TAT CGA TAC CGT CGA CGT AGT GGG TCC GAA AGG G  | This study |
| CH2981 | hcp1(KO)-OE-rev       | 5' - CCA CTA GTT CTA GAG CGG CTA CTC TTC GTC GAT GAA C  | This study |
| CH2982 | hcp1(KO)-Sac          | 5' - TTT <u>GAG CTC</u> CCA GGT GCA GGA GAT TC          | This study |
| CH2983 | hcp1(KO)-Kpn          | 5' - AAA <u>GGT ACC</u> TTC CAG AGT GTT ACA TGC         | This study |
| CH3020 | hcp1-Nco-for          | 5' - ATA <u>CCA TGG</u> CTA TTG ATA TGT TTC             | This study |
| CH3022 | hcp1-Xho-rev          | 5' - CTA <u>CTC GAG</u> TGC TTC TTT GTT TTC TTT G       | This study |
| CH3232 | rhsB-G47-Sac-for      | 5' - GCC <u>GAG CTC</u> GGC GCA TCC TGC CTT GGC         | This study |
| CH3233 | rhsB-L207amb-Bam-rev  | 5' - CAG <u>GGA TCC</u> TGC CCA GCT ACT TAG AGA GCG C   | This study |
| CH3234 | rhsB-E1001-Sac-for    | 5' - TAC <u>GAG CTC</u> GAA GGG CGT CTG CTG AAG C       | This study |
| CH3235 | rhsB-E1162amb-Bam-rev | 5' - TGT <u>GGA TCC</u> AGT AAA TCT AAC CGC TGC TCT GG  | This study |
| CH3316 | rhsA-T1133-Sac-for    | 5' - TTT <u>GAG CTC</u> ACA GAA GTG ATC AGC CAG         | This study |
| CH3317 | rhsA-D1324amb-Bam-rev | 5' - TTT <u>GGA TCC</u> CTA TAT TCG GGT TAG ACT ATT AGC | This study |
| CH3318 | rhsB-L683-Sac-for     | 5' - TTT <u>GAG CTC</u> TGC TGA GTG CCG TGA TC          | This study |
| CH3319 | rhsB-D858amb-Bam-rev  | 5' - TTT <u>GGA TCC</u> ACT AGC TTT CGA TAC CCA GCG C   | This study |
| CH3373 | tIe(KO)-Sac           | 5' - CAA <u>GAG CTC</u> CGG GAT GGT TGC C               | This study |
| CH3374 | tIe(KO)-Bam           | 5' - ATT <u>GGA TCC</u> GTC CTG TTA CCA GTC             | This study |
| CH3375 | tIe(KO)-Xho           | 5' - AGG <u>CTC GAG</u> ACA TTT CAA TTA TTA GG          | This study |
| CH3376 | tIe(KO)-Kpn           | 5' - AAC <u>GGT ACC</u> TGG CGA TAA ACC CGC             | This study |
| CH3377 | tIi(KO)-Xho           | 5' - CCA <u>ACT CGA</u> GTT AAA TAG GAA ACG             | This study |

|        |                            |                                                                                    |            |
|--------|----------------------------|------------------------------------------------------------------------------------|------------|
| CH3378 | tli(KO)-Kpn                | 5' - CCA <u>GGT ACC</u> AAA GTG CTG TGT GC                                         | This study |
| CH3391 | 3144(KO)-Sac               | 5' - GGT <u>GAG CTC</u> CGC ATA TGT GTT TAA GG                                     | This study |
| CH3392 | 3144(KO)-Bam               | 5' - CAT <u>GGA TCC</u> CTC TAC TTT ATA TGG                                        | This study |
| CH3393 | 3144(KO)-Eco               | 5' - AGA <u>GAA TTC</u> ATG AGG TTG TTA AAT AA                                     | This study |
| CH3394 | 3144(KO)-Kpn               | 5' - TCC <u>GGT ACC</u> TTT GCT TAA AGG G                                          | This study |
| CH3395 | 3145(KO)-Eco               | 5' - CAA <u>GAA TTC</u> AGG AAA AAA TTG ATT TTA                                    | This study |
| CH3396 | 3145(KO)-Kpn               | 5' - TTA <u>GGT ACC</u> TCG ATC CTT GCC G                                          | This study |
| CH3418 | tli-Kpn-for                | 5' - GAG <u>GGT ACC</u> ATG AAA TCG TTC TTA TCA GGC                                | This study |
| CH3419 | tli-Xho-rev                | 5' - ATA <u>CTC GAG</u> CTA TTT AAC CGG AGT TGG TG                                 | This study |
| CH3471 | eagR <sub>B</sub> -KO-Sac  | 5' - AAT <u>GAG CTC</u> ACT TTA TAT GGA AAT AAT CC                                 | This study |
| CH3472 | eagR <sub>B</sub> -KO-Bam  | 5' - AAA <u>GGA TCC</u> CAT TCC TTC ATT AAA CAG GCA C                              | This study |
| CH3473 | eagR <sub>B</sub> -KO-Eco  | 5' - CTT <u>GAA TTC</u> CCA CCA TTA ACA CCA GGG                                    | This study |
| CH3474 | eagR <sub>B</sub> -KO-Kpn  | 5' - ATC <u>GGT ACC</u> GAT GAA GAC GTT GTC CGA G                                  | This study |
| CH3558 | rhsA-N78-Sac-for           | 5' - GCG <u>GAG CTC</u> CTA ACC TGG CGG GTG                                        | This study |
| CH3559 | rhsA-M251och-Bam-rev       | 5' - GAG <u>GGA TCC</u> TTA CCC CAG TGC CAG C                                      | This study |
| CH3560 | rhsA-R801-Sac-for          | 5' - GGT <u>GAG CTC</u> CCG CTG GGA CAG C                                          | This study |
| CH3561 | rhsA-H967och-Bam-rev       | 5' - GCT <u>GGA TCC</u> TTA CCC GCT GCC GTA G                                      | This study |
| CH3636 | rhsI <sub>A</sub> -Xho-rev | 5' - GTG <u>CTC GAG</u> CAT TAA CAT ATT AAA TCG                                    | This study |
| CH3698 | rhsA-Q1330och-Bam-rev      | 5' - AAC <u>GGA TCC</u> TTA TTT TAA TCC CAG AGG GTC                                | This study |
| CH3699 | rhsA-R1041-Sac-for         | 5' - TAA <u>GAG CTC</u> GCG GGA AGA ACG GG                                         | This study |
| CH3775 | eagR <sub>A</sub> (KO)-Eco | 5' - GAT <u>GAA TTC</u> TAC TCT CTC GGC ACT CAG                                    | This study |
| CH3831 | rhsB-Q1278och-Not-rev      | 5' - AAC <u>GCG GCC GCT</u> TAC GCG GAG AGT CCC CAC                                | This study |
| CH3914 | rhsA-Eco-for               | 5' - TTT <u>GAA TTC</u> GGC ATG AGC GAT AAC AAC                                    | This study |
| CH3937 | vgrG2-T401-Sac             | 5' - ACA <u>CGA GCT CCT</u> GCT GGG TG                                             | This study |
| CH3938 | rhsA(1330)-Xho-rev         | 5' - TTT <u>CTC GAG</u> CTT ATT TTA ATC CCA GAG GGT CTA TTC                        | This study |
| CH3945 | vgrG2-VSV-rev              | 5' - CAA GAC GAT TCA TTT CAA TAT CAG TAT AAC TAG TAT CAC CCT TGG TCG TGA ATT TCG C | This study |
| CH3946 | VSV-Not-rev                | 5' - TTT <u>GCG GCC GCA TCC</u> TTA TTT GCC AAG ACG ATT CAT TTC AAT ATC AGT AT     | This study |

|        |                                              |                                                                                                |            |
|--------|----------------------------------------------|------------------------------------------------------------------------------------------------|------------|
| CH4190 | eagR <sub>A</sub> -Kpn-for                   | 5' - AGT <u>GGT ACC</u> ATG AAA TAC ACC CTC CAG G                                              | This study |
| CH4328 | rhsA-W1051-Kpn-for                           | 5' - TTC AGC <u>TGG TAC CGC</u> TGG                                                            | This study |
| CH4329 | rhsI <sub>A</sub> -Xho-rev                   | 5' - ACC <u>CTC GAG</u> CCT GCA GGT GTG GTC GAA CAT<br>TAA CAT ATT AAA TCG                     | This study |
| CH4400 | eagR <sub>A</sub> -Eco-for                   | 5' - AGT <u>GAA TTC</u> ATG AAA TAC ACC CTC CAG G                                              | This study |
| CH4452 | vgrG2-Eco-for                                | 5' - ATA <u>GAA TTC</u> ATG CTC AAC CGA ATT ACC                                                | This study |
| CH4453 | VSV-Xho-rev                                  | 5' - TGC <u>CTC GAG</u> ATC CTT ATT TGC CAA GAC G                                              | This study |
| CH4629 | rhsA-FLAG-Xho/Sbf-rev                        | 5' - GGT <u>CCT GCA GGC</u> TCG AGT TAT TTG TCA TCA<br>TCG TCC TTG TAG TCA GTA ATC CTC TTG CCA | This study |
| CH4631 | rhsA-R1321S-Spe-Xho-Sbf-rev                  | 5' - GGT <u>CCT GCA GGC</u> TCG AGG GTC TAT ACT AGT<br>TAG ACT ATT AGC ACC                     | This study |
| CH4632 | rhsA-R1321S-Spe-for                          | 5' - AGT CTA <u>ACT AGT</u> ATA GAC CCT CTG GG                                                 | This study |
| CH4898 | rhsA-D1323A-Spe-for                          | 5' - CTA <u>ACT AGT</u> ATA GCC CCT CTG GGA TTA AAA C                                          | This study |
| CH5386 | eagR <sub>A</sub> -His <sub>6</sub> -Eco-for | 5' - GAG <u>GAA TTC</u> ATG CAC CAT CAT CAT CAT CAT<br>TCT ATG AAA TAC ACC CTC CAG GAA GGT TCG | This study |
| CH5387 | rhsA(250)-Xho-rev                            | 5' - TTT <u>CTC GAG</u> TTA CCC CAG TGC CAG CCC                                                | This study |
| CH5388 | rhsA(966)-Xho-rev                            | 5' - TTT <u>CTC GAG</u> TTA CCC GCT GCC GTA GTA GAA C                                          | This study |
| CH5389 | rhsA(1323)-Xho-rev                           | 5' - TTT <u>CTC GAG</u> TTA TAT TCG GGT TAG ACT ATT<br>AGC ACC                                 | This study |
| CH5414 | rhsA(T23)-Nco/Spe-rev                        | 5' - CCG CCA TGG TAC TAG TGA TAT CCG CGA AAA<br>TGC                                            | This study |
| CH5415 | rhsA(A80)-Spe-for                            | 5' - ATC ACT AGT GCG GGT GTT ACT GAC GAT ATC<br>AG                                             | This study |
| CH5416 | rhsA-Nco-rev                                 | 5' - AGG CCA TGG TCG TTA TAG CGG                                                               | This study |
| ZR22   | tssB(KO)-Eco                                 | 5' - TTT <u>GAA TTC</u> AAA GGT AGC GAG GAG TAA TCG                                            | This study |
| ZR23   | tssB(KO)-Kpn                                 | 5' - TTT <u>GGT ACC</u> GCT GTG GTC AAA GTA GTA GTC<br>G                                       | This study |
| ZR26   | sfGFP-Spe-for                                | 5' - TTT <u>ACT AGT</u> GCA GCA GCT GGT GGA GGT AGC<br>AAA GGA GAA GAA CTT TTC AC              | This study |
| ZR27   | sfGFP-Bam-rev                                | 5' - TTT CTG <u>CAG GAT</u> CCT TAT TTG TAG AGC TCA<br>TCC ATG CC                              | This study |
| ZR155  | tssB-Sac-for                                 | 5' - TTT <u>GAG CTC</u> GCA GTT GCT GAA AAC CGT G                                              | This study |
| ZR306  | tssB-Spe-rev                                 | 5' - TTT <u>ACT AGT</u> CTC CTC GCT ACC TTT CGC ACT<br>TTC GTC ATT TTT CGG CAA CTG GCT         | This study |

<sup>b</sup>Restriction endonuclease sites are underlined.

## References

1. Beck CM, *et al.* (2014) CdiA from *Enterobacter cloacae* delivers a toxic ribosomal RNase into target bacteria. *Structure* 22:707-718.

2. Whitney JC, *et al.* (2014) Genetically distinct pathways guide effector export through the type VI secretion system. *Mol Microbiol* 92(3):529-542.
3. Perez A, *et al.* (2007) Cloning, nucleotide sequencing, and analysis of the AcrAB-TolC efflux pump of *Enterobacter cloacae* and determination of its involvement in antibiotic resistance in a clinical isolate. *Antimicrob Agents Chemother* 51(9):3247-3253.
4. Aiyar A, Xiang Y, & Leis J (1996) Site-directed mutagenesis using overlap extension PCR. *Methods Mol Biol* 57:177-191.
5. Cherepanov PP & Wackernagel W (1995) Gene disruption in *Escherichia coli*: TcR and KmR cassettes with the option of FLP-catalyzed excision of the antibiotic-resistance determinant. *Gene* 158(1):9-14.
6. Guzman LM, Belin D, Carson MJ, & Beckwith J (1995) Tight regulation, modulation, and high-level expression by vectors containing the arabinose PBAD promoter. *J Bacteriol* 177(14):4121-4130.
7. Koskiniemi S, *et al.* (2015) Genetic analysis of the CDI pathway from *Burkholderia pseudomallei* 1026b. *PLoS One* 10(3):e0120265.
8. Garza-Sanchez F, Janssen BD, & Hayes CS (2006) Prolyl-tRNA(Pro) in the A-site of SecM-arrested ribosomes inhibits the recruitment of transfer-messenger RNA. *J Biol Chem* 281(45):34258-34268.
9. Beckwith JR & Signer ER (1966) Transposition of the *lac* region of *Escherichia coli*. I. Inversion of the *lac* operon and transduction of *lac* by phi80. *J Mol Biol* 19(2):254-265.
10. Hayes CS & Sauer RT (2003) Cleavage of the A site mRNA codon during ribosome pausing provides a mechanism for translational quality control. *Mol Cell* 12(4):903-911.
11. Koskiniemi S, *et al.* (2013) Rhs proteins from diverse bacteria mediate intercellular competition. *Proc Natl Acad Sci U S A* 110(17):7032-7037.



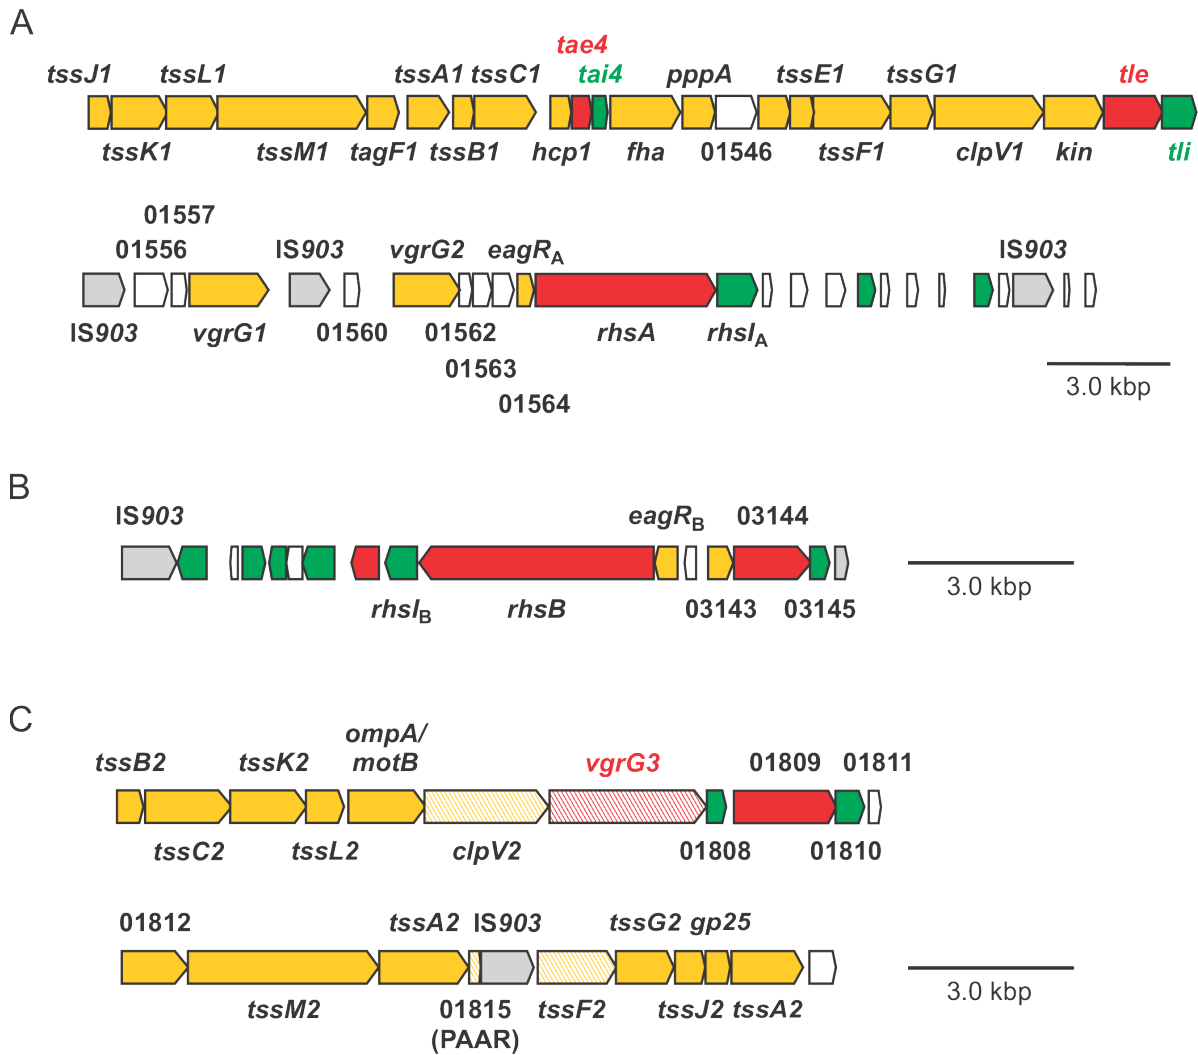

**Figure S1. ECL T6SS loci.** A) The T6SS-1 locus of *E. cloacae* ATCC 13047. Gene encoding hypothetical proteins of unknown function are indicated by their corresponding ordered locus number. B) The *eagR<sub>B</sub>-rhlB* locus of *E. cloacae* ATCC 13047. C) The T6SS-2 locus of *E. cloacae* ATCC 13047. Hatched fills indicate pseudogenes as described in the manuscript text. For all panels, effector genes are rendered in red and predicted immunity genes in green. IS903 elements are shown in grey.

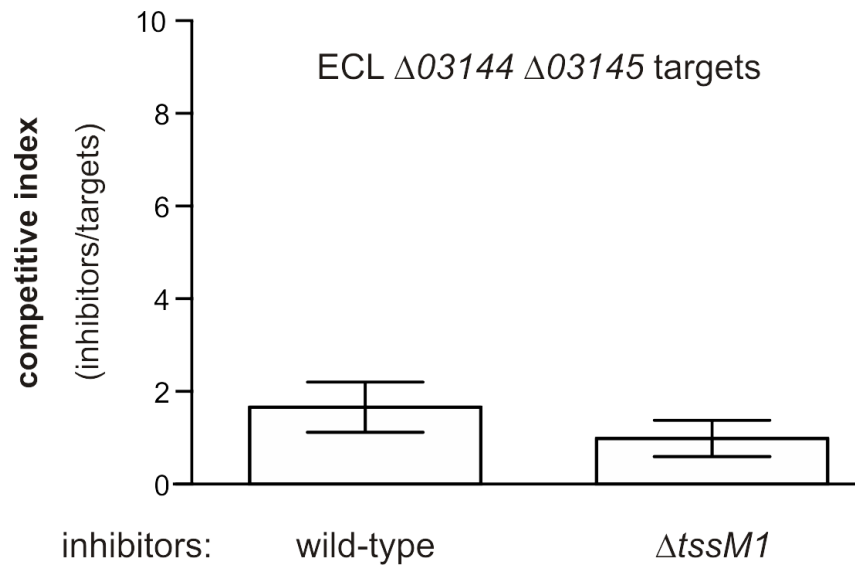

**Figure S2. Analysis of a predicted PAAR-domain containing T6SS-1 effector.** ECL  $\Delta 03144$   $\Delta 03145$  target bacteria were co-cultured at a 1:1 ratio with wild-type or  $\Delta tssM1$  ECL inhibitor strains for 4 h. The competitive index is the ratio of inhibitor to target bacteria at 4 h divided by the initial ratio. Data are the average  $\pm$  SEM for three independent experiments.

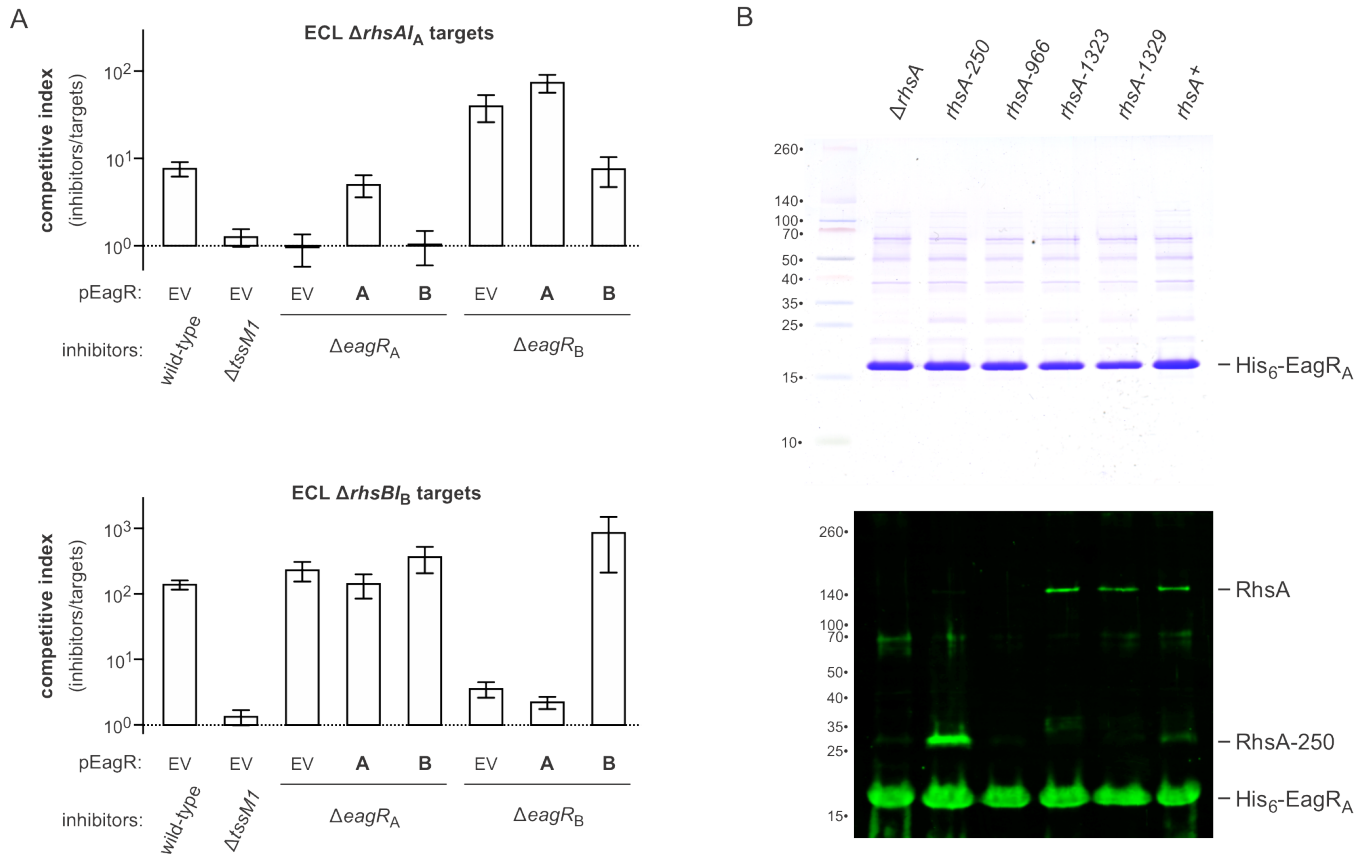

**Figure S3. EagR proteins are required for Rhs effector activity.** A) Target bacteria were co-cultured at a 1:1 ratio with ECL inhibitor strains for 4 h. Where indicated, the inhibitor strains were complemented with plasmid-borne *eagR<sub>A</sub>*, *eagR<sub>B</sub>* or empty vector (EV). The competitive index is the ratio of inhibitor to target bacteria at 4 h divided by the initial ratio. Data are the average  $\pm$  SEM for three independent experiments. B) Truncated RhsA proteins accumulate in ECL. Over-produced His<sub>6</sub>-EagR<sub>A</sub> was isolated by Ni<sup>2+</sup>-affinity chromatography from ECL  $\Delta rhsB$  strains that harbor the indicated *rhsA* alleles. Samples were analyzed by SDS-PAGE (top) and immunoblotting with polyclonal antibodies to RhsA (bottom). Because His<sub>6</sub>-tagged RhsA was used as an antigen, the antisera cross-reacts with the His<sub>6</sub> epitope on EagR<sub>A</sub>.

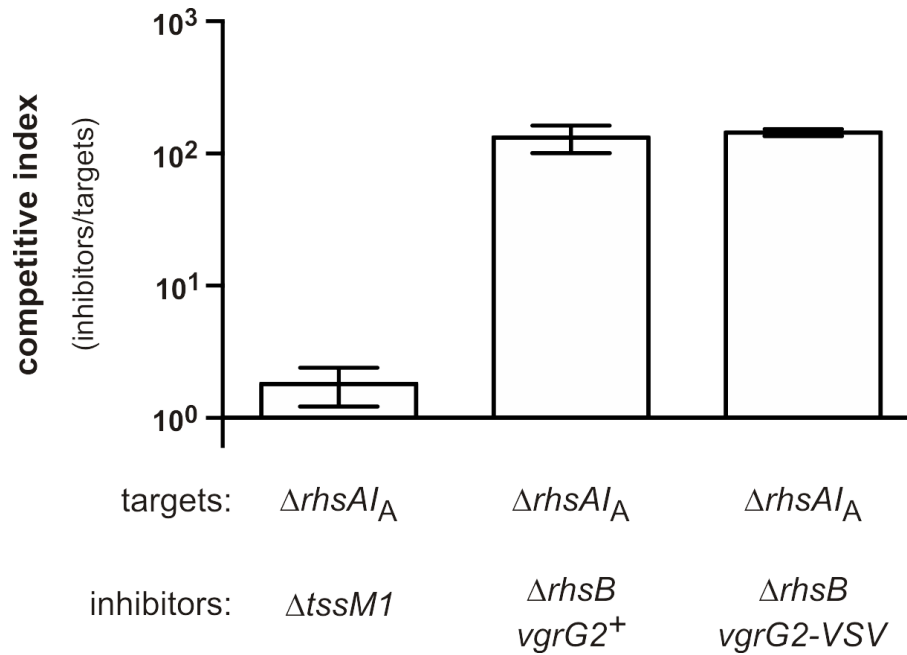

**Figure S4. VgrG2-VSV supports T6SS-1 activity.** ECL  $\Delta rhsA \Delta rhsI_A$  target bacteria were co-cultured at a 1:1 ratio with the indicated ECL inhibitor strains for 4 h. The competitive index is the ratio of inhibitor to target bacteria at 4 h divided by the initial ratio. Data are the average  $\pm$  SEM for three independent experiments.

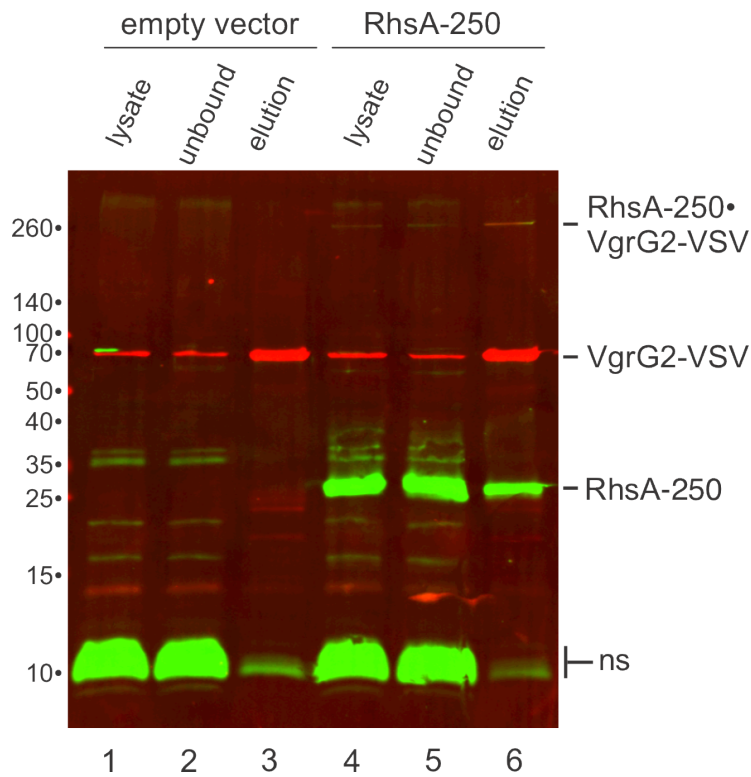

**Figure S5. Over-produced RhsA-250 stabilizes VgrG2-VSV trimers in ECL.**  $EagR_A$  and RhsA-250 were over-produced with VgrG2-VSV in ECL  $\Delta rhsB \Delta rhsA$  cells for isolation by anti-VSV immunoprecipitation. Crude lysates and the unbound and elution fractions from anti-VSV agarose resin were resolved on two-layer 7.5%/15% polyacrylamide gels and immunoblotted with antibodies to RhsA (green) and VSV-G (red). Non-specific (ns) ECL proteins detected by RhsA antisera are indicated.

## Supporting Information Movies

**Movie S1.** Time-lapse microscopy of ECL *tssB1-gfp* cells (CH12483).

**Movie S2.** Time-lapse microscopy of ECL *tssB1-gfp*  $\Delta$ *tssM1* cells (CH12561).

**Movie S3.** Time-lapse microscopy of ECL *tssB1-gfp*  $\Delta$ *rhsA*  $\Delta$ *rhsB* cells (CH12594).

**Movie S4.** Time-lapse microscopy of ECL *tssB1-gfp*  $\Delta$ *vgrG1*  $\Delta$ *vgrG2* cells (CH12564).

**Movie S5.** Time-lapse microscopy of ECL *tssB1-gfp*  $\Delta$ *rhsB* *rhsA*<sup>+</sup> cells (CH12609).

**Movie S6.** Time-lapse microscopy of ECL *tssB1-gfp*  $\Delta$ *rhsB* *rhsA*-1323 cells (CH12614).

**Movie S7.** Time-lapse microscopy of ECL *tssB1-gfp*  $\Delta$ *rhsB* *rhsA*-1330 cells (CH12615).

**Movie S8.** Time-lapse microscopy of ECL *tssB1-gfp*  $\Delta$ *rhsB* *rhsA*-250 cells (CH12612).

**Movie S9.** Time-lapse microscopy of ECL *tssB1-gfp*  $\Delta$ *rhsB* *rhsA*-966 cells (CH12613).

**Movie S10.** Time-lapse microscopy of ECL *tssB1-gfp*  $\Delta$ *rhsA*  $\Delta$ *rhsB* cells (CH12594).
